# Supplementary material for: Predictors of Repeat Medical Emergency Team Activation in Deteriorating Ward Patients: A Retrospective Cohort Study
Source: MDPI journal article supplement (doi:10.3390/jcm11061736), 2022-03-21
Supplement: s1 [file s1]

## Supplementary Materials

**Table S1.** Subgroup analysis in patients with medical emergency team activation due to respiratory causes.

| Variables                                | Repeat MET Activation |                       | <i>p</i> |
|------------------------------------------|-----------------------|-----------------------|----------|
|                                          | Yes ( <i>n</i> = 531) | No ( <i>n</i> = 2162) |          |
| Age, yr                                  | 66 (53–74)            | 66 (55–74)            | 0.704    |
| Male gender                              | 358 (67.4)            | 1378 (63.7)           | 0.117    |
| Department                               |                       |                       | 0.004    |
| Medicine                                 | 490 (92.3)            | 1899 (87.8)           |          |
| Surgery                                  | 41 (7.7)              | 263 (12.2)            |          |
| Comorbidities                            |                       |                       |          |
| Solid tumor                              | 156 (29.4)            | 1215 (56.2)           | <0.001   |
| Hematological malignancies               | 121 (22.8)            | 213 (9.9)             | <0.001   |
| Chronic lung disease                     | 120 (22.6)            | 381 (17.6)            | 0.011    |
| Chronic heart disease                    | 256 (48.2)            | 970 (44.9)            | 0.173    |
| Chronic liver disease                    | 42 (7.9)              | 240 (11.1)            | 0.033    |
| Chronic renal disease                    | 29 (5.5)              | 91 (4.2)              | 0.240    |
| Vital parameter at first MET activation  |                       |                       |          |
| Systolic blood pressure (mmHg)           | 123 (107–140)         | 124 (109–142)         | 0.007    |
| Heart rate (beats/min)                   | 110 (93–126)          | 109 (93–123)          | 0.278    |
| Respiratory rate (breaths/min)           | 27 (22–32)            | 26 (22–31)            | 0.001    |
| Body temperature (°C)                    | 36.9 (36.5–37.6)      | 36.8 (36.5–37.4)      | 0.124    |
| SpO <sub>2</sub> (%)                     | 94 (90–97)            | 93 (89–97)            | 0.186    |
| FiO <sub>2</sub> (%)                     | 0.50 (0.32–0.55)      | 0.45 (0.29–0.50)      | <0.001   |
| SpO <sub>2</sub> /FiO <sub>2</sub> ratio | 200 (140–229)         | 236 (182–350)         | <0.001   |
| Modified early warning score             | 5 (3–6)               | 4 (3–6)               | <0.001   |
| SOFA                                     | 6 (4–8)               | 4 (3–6)               | <0.001   |

MET = medical emergency team; SOFA = sequential organ failure assessment. Data are expressed as median with interquartile range or number (percentage).
